## **Survey and Molecular Detection of Sri Lankan Cassava Mosaic Virus in Thailand**

Kingkan Saokham<sup>1,2</sup>, Nuannapa Hemniam<sup>3</sup>, Sukanya Roekwan<sup>3</sup>, Sirikan Hunsawattanakul<sup>4</sup>,  
Jutathip Thawinampan<sup>3</sup>, and Wanwisa Siriwan<sup>3\*</sup>

<sup>1</sup>Center of Agricultural Biotechnology, Kasetsart University, Kamphaeng Saen Campus,  
Nakhon Pathom 73140, Thailand

<sup>2</sup>Center of Excellence on Agricultural Biotechnology (AG-BIO/PERDO-CHE), Bangkok  
10900, Thailand

<sup>3</sup>Department of Plant Pathology, Faculty of Agriculture, Kasetsart University, Bangkok  
10900, Thailand

<sup>4</sup>Department of Agronomy, Faculty of Agriculture, Kasetsart University, Bangkok 10900,  
Thailand

\*Correspondence: [wanwisa.si@ku.th](mailto:wanwisa.si@ku.th)

## ABSTRACT

Cassava plantations in an area of 458 ha spanning five provinces along the Thailand–Cambodia border were surveyed from October 2018 to July 2019 to determine the prevalence of cassava mosaic disease (CMD) caused by Sri Lankan cassava mosaic virus (SLCMV) in the region. CMD prevalence was 40% in the whole area and 80% in Prachinburi, 43% in Sakaeo, 37% in Buriram, 25% in Surin, and 19% in Sisaket provinces. Disease severity was generally scored as 2–3. The highest average disease severity was in Sakaeo province (3.7), followed by Buriram (3.6), Prachinburi (2.88), Surin (2.5), and Sisaket (2.4) provinces. Asymptomatic plants were identified in Surin (12%), Prachinburi (5%), Sakaeo (0.2%), and Buriram (0.1%) by PCR analysis. Interestingly, cassava cultivars CMR-89 and Rayong 11 were susceptible to CMD. In approximately 95% of cases, the infection was transmitted by whitefly (*Bemisia tabaci*), which had a high population density in Prachinburi but was sparse in Surin, with the largest populations observed in May and June. Nucleotide sequencing of the mitochondrial *cytochrome oxidase 1* (*mtCOI*) gene of whitefly (*Bemisia tabaci*) in Thailand revealed a similarity to the Asia II 1 whitefly gene. Furthermore, the *AVI* gene—which encodes the capsid protein—showed 90% nucleotide identity with SLCMV. Phylogenetic analysis of completed nucleotide sequences of DNA-A and DNA-B components of the SLCMV genome determined by rolling circle amplification (RCA) indicated that they were similar to the nucleotide sequence of SLCMV isolates from Thailand, Vietnam, and Cambodia. These results provide important insights into the distribution, impact, and spread of CMD and SLCMV in Thailand.

**Keywords:** Cassava mosaic disease (CMD), survey, molecular detection, whitefly (*Bemisia tabaci*)

## BACKGROUND

Cassava is one of the most important food crops cultivated in Southeast Asia.

Approximately 55 million tons of cassava are produced in Southeast Asian countries per year, accounting for 30% of the global cassava production and valued at more than 10 million US dollars (USD). Thailand is one of the largest exporters of cassava products in the world and has a production capacity of approximately 31 million tons per year. In 2019, the export value of cassava was 2.66 billion USD [1].

Cassava mosaic disease (CMD) is one of the most dominant diseases in Africa and Asia, and cassava mosaic geminiviruses are among the top 10 viruses affecting economically important plants [2]. CMV, which was first reported in Tanzania [3], belongs to the genus *Begomovirus* (family *Geminiviridae*) [4]. Plants affected by CMD have misshapen leaflets with foliar yellow or green mosaic patterns, curls, distortions, and mottling, which reduce the leaflet size and give a general appearance of stunting [5]. The virus has a twinned icosahedral particle morphology and contains two genomic DNA components (DNA-A and DNA-B) [6]. The virus is transmitted by whitefly (*Bemisia tabaci*) and via infected stem cuttings [7]; in Africa, these were shown to reduce the cassava yield by 35%–60% and 55%–77%, respectively [8]. Although nine CMV species have been reported across Africa and on islands in the Indian Ocean, only two are found in Asia including Indian cassava mosaic virus and Sri Lankan cassava mosaic virus (SLCMV) [9], with only the latter reported in Southeast Asia [10].

In December 2015, CMD was reported in Ratanakiri province located in Northeast Cambodia [11]. CMD emerged in Southeast Asia in 2016–2017. In 2017, a survey of CMD

was conducted in the Cambodian province of Stung Treng, which experienced an SCLMV outbreak despite its distant location from Ratanakiri [12]. Additionally, the Vietnam Academy of Agricultural Sciences Plant Protection Research Institute reported CMD in Tay Ninh province, where it damaged the established crop spanning more than 1200 ha of land in 2017 [13]. Based on a survey conducted in July and August 2018, the Department of Agriculture (DOA of Thailand identified 22 plants with CMD symptoms in a 2.27-ha cassava plantation in Sisaket and Surin provinces in northeastern Thailand. According to the DOA, the infected plants were subsequently removed. However, CMD currently (2020–2021) affects more than 45,000 ha of the main cassava production area in Thailand [[www.forecast-ppsf.doae.go.th](http://www.forecast-ppsf.doae.go.th)] and has already been reported in South China and Laos [14, 15].

The current study presents the outcome of a CMD survey conducted across cassava plantations in five major provinces along the Thailand–Cambodia border from October 2018 to July 2019. We used appropriate and standardized procedures including PCR and DNA sequencing to detect CMD in the tested samples. The results of this survey provide an estimate of the spread and severity of CMD, prevalence of the whitefly vector, and classification of whitefly biotypes.

## **MATERIALS AND METHODS**

### **Survey routes and sample collection**

The survey was conducted from October 2018 to July 2019. Five major cassava-producing provinces of Thailand (Sisaket, Surin, Buriram, Sakaeo, and Prachinburi) located on the

border with Cambodia were surveyed. An area of 458 ha planted with cassava (201 cassava fields) was used as a representative sample of cassava plantations in the five provinces. In total, 30 3- to 6-month old cassava plants were randomly sampled from a 1-ha area of the plantation along two paths intersecting in an “X”; leaves were collected from the plants for PCR detection. The precise location of sampled plants was determined using the global positioning system (Compass Deluxe Navigation, a free application) [15]. The cultivar and age of sampled cassava plants, mode of CMD transmission, symptom severity, and number of whiteflies were noted in a record sheet similar to that used in a previous study [16], with minor modifications. The size of whitefly populations was determined by counting the numbers of adult whiteflies on the five topmost leaves of each sampled plant [17].

The severity of CMD symptoms was scored on a scale ranging from 1 to 5 (1=no visible symptoms; 2=mild chlorosis of the entire leaflet or mild distortion at the base of the leaflet, but overall green and healthy leaves; 3=moderate mosaicism throughout the leaf, and narrowing and distortion of the lower one-third of the leaflet; 4=severe mosaic and distortion of two-thirds of the leaflets, with general reduction in leaf size; and 5=severe mosaicism, with distortion of the entire leaf) [18]. Depending on the mode of transmission, CMD was recorded as either cutting-borne (lowest earliest-formed leaves showing symptoms) or whitefly-borne (uppermost leaves showing symptoms).

Disease incidence (%) was calculated using the following equation:

$$Disease\ incidence = \frac{(N - n)}{N} \times 100$$

where  $N$  is the total number of observations and  $n$  is the total number of plants with no disease symptoms.

Disease prevalence rate (%) was calculated using the following equation [19]:

$$\text{Disease prevalence} = \frac{\text{Number of fields with visible symptoms}}{\text{Total number of fields observed}} \times 100$$

The latent infection rate (%) was calculated as follows:

$$\text{Latent infection} = \frac{\text{Number of asymptomatic plants}}{\text{Total number of plants collected}} \times 100$$

Adult whiteflies were collected from cassava fields located in Buriram, Sakaeo, and Surin provinces using an aspirator, and transferred to 1.5-ml tubes containing 90% ethanol that were stored at  $-20^{\circ}\text{C}$ .

### **DNA extraction and SLCMV detection**

DNA was extracted from dried cassava leaves (20 mg) using the modified cetyl trimethylammonium bromide (CTAB) method [20]. Briefly, the leaves were crushed in CTAB buffer using metal beads and incubated at  $65^{\circ}\text{C}$  for 30 min. The homogenized mixture was then added to 700  $\mu\text{l}$  of chloroform:isoamyl alcohol (24:1) and DNA was precipitated using isopropanol alcohol for 3 h. The DNA pellet was washed twice with 70% ethanol and then dried at room temperature for approximately 30 min. The DNA was resuspended in water containing 100  $\mu\text{g/ml}$  RNase (Thermo Fisher Scientific, Waltham, MA, USA) and stored at  $-20^{\circ}\text{C}$ . The quality and quantity of the isolated DNA were assessed by agarose gel electrophoresis and spectrophotometry [21].

To isolate DNA from whiteflies, five adults were randomly selected from among

those collected at each location. Genomic DNA was isolated as previously described [22], with minor modifications. Briefly, each whitefly was crushed in lysis buffer (200 mM NaCl and 200 mM Tris-HCl [pH 8.0]) containing  $\beta$ -mercaptoethanol and proteinase K (10 mg/ml), and the mixture was incubated at 65°C for 90 min. DNA was recovered by centrifugation.

To detect SLCMV, the *AVI* gene (encoding coat protein) was amplified from SLCMV-infected cassava leaf samples by PCR using sequence-specific primers (forward: 5'-GTT GAA GGT ACT TAT TCC C-3' and reverse: 5'-TAT TAA TAC GGT TGT AAA CGC-3') designed in our laboratory and amplifying a 948-bp product. A partial fragment of the mitochondrial cytochrome oxidase 1 (*mtCOI*) gene was amplified from whitefly DNA using primers C1-J-2195 (5'-TTG ATT TTT TGG TCA TCC AGA AGT-3') and L2-N-3014 (5'-TCC AAT GCA CTA ATC TGC CAT ATT A-3') [23], yielding a 1258-bp product. PCR amplification was performed in a 25- $\mu$ l reaction volume containing 1 $\times$  PCR buffer (PCR Biosystems, London, UK), 0.2  $\mu$ M each of forward and reverse primers, and approximately 50 ng of the DNA template. The thermal cycling conditions were as follows: initial denaturation at 94°C for 5 min; 35 cycles of denaturation at 94°C for 40 s, annealing at 55°C (*AVI*) or 52°C (*mtCOI*) for 40 s, and elongation at 72°C for 40 s; and final elongation at 72°C for 5 min. The amplified PCR products were separated on a 1% agarose gel alongside a 1-kb DNA ladder (Thermo Fisher Scientific) that was stained with RedSafe Nucleic Acid Staining Solution (iNtRON Biotechnology, Sangdaewon, South Korea) in 1 $\times$  Tris–acetate–EDTA buffer. The gels were visualized using a Gel Doc imaging system (Syngene, Frederick, MD, USA). Confirmed negative and positive controls were included in all assays.

## **Complete genome characterization of the SLCMV isolate collected in Thailand**

The Buriram province isolate was selected as a representative of CMV species diversity. The circular DNA of this isolate was obtained by rolling circle amplification (RCA) using phi29 DNA Polymerase (New England Biolabs, Ipswich, MA, USA), according to the manufacturer's instructions. The RCA product was digested with restriction endonucleases, and a ~2.7-kb fragment (the expected size of DNA-A and DNA-B fragments of SLCMV) was amplified from the digestion products. The DNA-A and DNA-B fragments were purified and cloned into the pGEM-T Easy vector (Promega, Madison, WI, USA) and then transformed into *Escherichia coli* strain DH5 $\alpha$  cells by the heat shock method. The cloned inserts were sequenced in their entirety by primer walking (Supplementary Fig. S1).

## **Sequencing and phylogenetic analysis**

Nucleotide sequences of the amplified fragments were searched in the National Center for Biotechnology Information database using BLAST (<https://blast.ncbi.nlm.nih.gov/Blast.cgi>). Multiple sequence alignment of the nucleotide sequences was performed using Molecular Evolutionary Genetics Analysis version X (MEGA X; <http://www.megasoftware.net/>) [24]. Phylogenetic trees were constructed in MEGA X using the neighbor-joining method with 1000 bootstrap replications.

## **RESULTS**



## **SLCMV diagnosis and symptom analysis**

Field data collected during the survey are summarized in Supplementary Table S1. The CMD prevalence data indicated that 80 cassava fields (40%) were infected with CMV. Severe CMD infection was identified in Prachinburi and Sakaeo provinces, whereas fields in Sisaket, Surin, and Buriram provinces showed mild infection. CMD prevalence was 80% in Prachinburi, 43% in Sakaeo, 37% in Burium, 25% in Surin, and 19% in Sisaket provinces (Table 1).

Infected cassava plants showed at least one of the typical CMD foliar symptoms such as green or yellow mosaic pattern, leaflet curling, and leaflet narrowing with distortion. Disease transmitted through infected stems caused symptoms in the whole plant, whereas transmission by whiteflies caused symptoms in only the top part of the plant [16].

Approximately 95% of the CMD incidence was attributable to whiteflies, with stem cuttings being responsible for 5% of infections. Stem cutting- and whitefly-borne infection appeared in the same plot. CMD symptoms typically appear 3–5 weeks after infection [25]. We determined that the initial infection of the plantation was from cuttings whereas the second epidemic was whitefly-borne based on the age of infected plants in the field. This was supported by our once-monthly observation of 2-month-old cassava plants in 1 ha of the plantation in Surin province over a period of 2 months (until they were 4 month old). At the first inspection, we found four plants infected by stem cuttings; in the second visit, 10 plants show CMD symptoms on the top 4–6 leaves; and in the last inspection, 15 plants were infected by whiteflies. This phenomenon was observed not only in Surin but also in other provinces included in the survey.

There was also a strong relationship between the mode of infection and whitefly populations. CMD was mainly spread by whiteflies, especially in Prachinburi, Sakaeo, and Buriram provinces, and disease incidence showed no significant difference between Sisaket and Surin provinces (Table 1).

### **SLCMV prevalence and symptom severity**

Single leaves were collected from 6120 cassava plants across 201 fields; 1434 were found to contain the virus by PCR analysis. The highest infection rate was in Sakaeo province (61.7%), followed by Prachinburi (20%), Surin (13%), Buriram (4.5%), and Sisaket (0.8%) provinces.

CMD severity scores were mostly between 2 and 3. The highest average disease severity was in Sakaeo province (3.7), followed by Buriram (3.6), Prachinburi (2.88), Surin (2.5), and Sisaket (2.4) provinces (Table 1). The age of plants was correlated with the severity of disease symptoms. For example, 1- to 3-month-old infected plants showed an average severity of 3.75 (moderated to severe mosaicism), whereas 5- to 7-month-old plants showed a severity score of 2.58 (mild chlorosis). Symptoms caused by cutting-borne disease were more severe than those caused by whitefly-borne infection.

Asymptomatic plants were detected in 22 (11%) cassava fields, especially in Surin (12%), Prachinburi (5%), and Sakaeo (0.2%) provinces. The lowest proportion of asymptomatic plants (0.1%) was in Buriram province.

We also surveyed cassava cultivars grown in the study area. Seven cassava cultivars

were identified on the surveyed route (Huai Bong 90, Huai Bong 80, Rayong 9, Rayong 11, Rayong 72, Kasetsart 50, and CMR-89). Many farmers planted several cultivars in a single plot. The CMR-89 cultivar was the most prevalent in the surveyed area, accounting for approximately 53% of the total area, followed by Rayong 72 (36%) and Kasetsart 50 (5%) (Table 2).

The disease severity was 3.6 and 3.5 in Rayong 11 and CMR-89, respectively, but lower (2–3) in Kasetsart 50, Huai Bong 90, Huai Bong 80, Rayong 9, and Rayong 72, indicating that CMR-89 and Rayong 11 were more susceptible to CMD than the other cultivars. The main mode of transmission in all cassava cultivars was through whitefly (Table 2).

### **Assessment of whitefly population size**

Whitefly nymphs and adults were collected from the abaxial surface of the five topmost leaves of cassava plants. The nymphs had a flattened oval shape and appeared more like a scaly insect. The average number of whiteflies per plant was highest in Prachinburi province (12.2), followed by Sakaeo (5.4), Buriram (4.0), Sisaket (0.5), and Surin (0.3) provinces (Table 1).

This survey was conducted from October 2018 to July 2019, which spans the cold season (October–February), summer season (March), and rainy season (July). Whitefly numbers were counted from December 2018 to July 2019 because during these months, the cassava plants were approximately 2–4 months old, which facilitated the counting. The number of whiteflies was high from May to July, with an average of 11.77, 10.6, and 6.59

per plant in May, June, and July, respectively; the average numbers were low from December to March.

### **Amplification, sequencing, and phylogenetic analysis of whitefly *mtCOI* gene**

The nucleotide sequence of the *mtCOI* gene amplified from the DNA of whiteflies collected from Surin, Sakaeo, and Buriram provinces have been deposited in the DNA Data Bank of Japan (DDBJ) under accession numbers LC579572, LC579573, and LC579574, respectively. The *mtCOI* gene amplified from whiteflies in these provinces showed 99% sequence similarity to that of *B. tabaci* Asia II 1. Phylogenetic analysis of the *mtCOI* sequences of *B. tabaci* from Thailand showed that they grouped closely with reference sequences determined for a large number of Asia II 1 species collected from other regions in the world (Fig. 1).

### **PCR-based detection of CMV**

PCR products were amplified from 1434 of 6120 samples collected from the five provinces using *AVI*-specific primers. Of the 1434 PCR-positive samples, 61.7% were collected from Sakaeo, 20% from Prachinburi, 13% from Surin, 4.5% from Buriram, and 0.8% from Sisaket provinces. The PCR results also revealed that 205 samples harbored a latent infection; of these cases, samples from Surin and Buriram provinces showed the highest and lowest percent infection rates, respectively, whereas no latent infection was detected in plant samples from Sisaket province. Additionally, among the different cultivars, latent

infection was detected in CMR-89 and Rayong 72 but not in Kasetsart 50, Rayong 9, Rayong 11, Huaibong 80, and Huaibong 90.

### **Whole-genome sequence of SLCMV**

The complete genomic DNA of the Burirum SLCMV isolate was obtained by RCA and nucleotide sequences of DNA-A and DNA-B were submitted to the DDBJ under accession numbers LC586845 and LC588395, respectively. A BLAST search revealed that DNA-A and DNA-B nucleotide sequences of the Burirum isolate were identical to those of previously characterized SLCMV isolates, with the highest sequence identity (99%) to isolates from Prachinburi (MN026159) [15].

We also conducted a phylogenetic analysis of the whole genome sequence of the Burirum SLCMV isolate. The phylogenetic tree indicated that the SLCMV isolates collected in our study belonged to the same species and were closely related to isolates from Vietnam (GenBank accession numbers LC312131 and LC312130); Cambodia (KT861468 and KT861469); Thailand (MN577578, MN954656, MT017511, MN026160, MN544647, MN577579, MN577575, MN577577, MN026159, MN577580, MN544648, and MN026161), China (MH891840, MN688216, MN688251, and MN688217); and India (AJ890228, KF898349, AJ607394, KC424490, KU550961, MK404226, and AY730036) (Figs. 2 and 3).

### **DISCUSSION**

This study presents the findings from an analysis of the SLCMV outbreak in five provinces of Thailand from October 2018 to July 2019. Our survey was conducted after the DOA reported CMD in Thailand in August 2018. We surveyed CMD incidence and whitefly populations in an area where CMD has been previously reported as well as in new cassava plantations along the Thailand–Cambodia border. Interestingly, CMD spread was detected in some locations in five provinces where the disease was thought to have been eradicated by the DOA. While the radius of the geographic area is an important factor affecting the eradication of CMD, other factors should also be considered such as planting distance, geographic location, mode of infection, and whitefly numbers [9].

A CMD outbreak was reported in Stung Treng province, Cambodia in 2016–2017 [12]. Stung Treng is situated at a distance of approximately 300 km from the Thailand border. Thailand is the main distributor of cassava to Cambodia, Laos, and other Southeast Asian countries [26]. CMD could rapidly spread through infected plant material transported across this region. We determined that the CMD outbreak in Thailand was initially caused by infected stem cuttings (primary infection source), while the second wave of the epidemic was caused by CMV transmission by whiteflies. In Africa, CMD epidemics have been primarily driven by whitefly [5, 9, 27, 28]; however, in Asia, whiteflies appear to play a secondary role in CMD spread. Nonetheless, the results of epidemiologic studies in Ivory Coast, Kenya, and Uganda support our speculation that the spread of CMD into and within the experimental cassava cultivation area was directly related to the number of adult whiteflies present and to the incidence of CMD, as determined by the locality or administrative district where the trials were carried out and where CMD dissemination was widespread. Any subsequent spread of CMD is attributable to the viruliferous whiteflies

moving between or within planting areas after acquiring the virus from cassava plants grown from infected cuttings or infected by whiteflies during growth [27, 29].

The region bordering Thailand and Cambodia is rich in forests and high mountains, which act as a natural barrier to the movement of whiteflies. It is possible that CMD incidence in Thailand near the Cambodian border was caused by the exchange of infected cassava planting material among local populations.

Disease incidence is related to fluctuations in the whitefly population due to environmental factors such as rainfall, wind, and temperature [8]. We found a large number of whiteflies in Prachinburi and Sakaeo provinces, consistent with the disease incidence rates in these provinces (Table 1). Furthermore, the whitefly population size impacts the spread of CMD, as whiteflies can travel distances of up to 100 km a year [5], with an estimated flight speed of approximately 0.2 m/s [8]. During its life cycle of approximately 30–40 days, a female whitefly lays up to 300 eggs on the abaxial surface of leaves [30]. Temperature, humidity, and rainfall influence the population size of adult whiteflies. Conditions that are conducive to an increase in whitefly numbers include temperatures <math><35^{\circ}\text{C}</math> and a relative humidity of approximately 65%–73% [14]. In this study, we observed that whitefly density was the highest in the month of May, followed by June and July. May marks the beginning of the rainy season in Thailand, with temperatures <math><30^{\circ}\text{C}</math> and approximately 64% relative humidity [31]. We therefore propose that farmers should be persuaded to change the traditional planting practices—which include planting soon after the onset of the rainy season—to avoid high disease incidence caused by abundant whitefly populations.

We found that most of the infections were caused by whitefly, which influenced the spread of CMD in the surveyed area. CMV transmitted by whiteflies has caused CMD not only in Thailand but also in Africa since the 16th century [32]. Understanding the ecologic and biological characteristics of whiteflies can aid in the prediction of future CMD epidemics according to weather data, thereby facilitating disease management [16].

CMD is more severe in susceptible genotypes than in resistant varieties [33]. However, disease severity is affected by the virus strain, plant age, plant genotype, and environmental conditions [34]. In CMD-resistant varieties, the appearance of symptoms in leaves is influenced to a greater extent by cooler temperatures than by hot weather [35]. Moreover, symptoms are exacerbated in plants regenerated from infected planting material. In this study, CMR-89 was susceptible to CMD (>70% disease incidence) and showed the highest disease severity among the seven tested cultivars. Although CMR-89 is not a DOA certified cultivar, it is grown in approximately 22% of cassava plantations in Thailand (Office Agricultural Economics 2018). In one study that screened CMD resistance in cassava cultivars by grafting, CMR-89 and Rayong 11 were found to be susceptible to CMD whereas Kasetsart 50, Rayong 72, and Huai Bong 60 were moderately resistant [36]. Discontinuing the cultivation of CMR-89 and promoting that of CMD-tolerant or moderately resistant cultivars is critical for controlling this disease.

During the survey, we found that the pattern of CMD spread differed depending on the mode of transmission. Most cassava plants infected by whitefly were located at the edge of the plot, with the infection then spreading inward. Whitefly density was especially high in newly planted cassava stands located close to mature cassava plants. Similar cases have been reported in several countries in East and West Africa, where new cassava plantings



were colonized by whitefly populations immigrating from older cassava stands in the area. The immigrant whiteflies reproduced to reach their peak population size within a few months, and before the population declined adults dispersed to younger cassava plants [37-39]. Thus, the whitefly count can be useful for predicting and controlling the spread of CMD, and farmers should frequently monitor their cassava plants and whitefly populations.

CMD has been reported in several Southeast Asian countries. SLCMV has been detected in cassava fields in Thailand, and similar viruses have been reported in Cambodia, Vietnam, and China [11, 12, 15]. CMD was reported in Thailand in 2018 after its occurrence in Cambodia and Vietnam. The viral strain identified in this study has the same origin as that first reported in Ratanakiri, Cambodia and in other studies conducted in Thailand [15, 40].

The Rep protein encoded by DNA-A of the Burirum SLCMV isolate had seven additional amino residues at its C-terminal end. This 7-amino-acid motif is essential for the accumulation of Rep protein and virulence of SLCMV [10]. The genomes of SLCMV isolates from Southern India, Sri Lanka, and Southeast Asia were not recombinant but harbored a point mutation [15]. Additionally, SLCMV isolates from Southeast Asia, China, and India clustered together in a separate group from the original SLCMV isolate from Colombo, Sri Lanka (AJ314737) [6] (Fig. 2). Further investigation is needed to determine the host range of SLCMV, clarify the mechanisms of transreplication of its DNA components, and identify genetic determinants of symptoms.

According to the phylogenetic analysis, the partial coding sequence of *mtCOI* of *B. tabaci* from Thailand was classified as an Asia II 1 cryptic species. Asia II 1 whiteflies

readily transmit SLCMV, whereas Middle East Asia Minor 1 and Mediterranean whiteflies are poor vectors of the virus [41]. Thus, the potential for virus transmission is associated with the virus and whitefly species. In cassava fields in southern Vietnam, multiple indigenous whitefly species have been identified including Asia 1, Asia II 1, and Asia II 6 [42]. An Asia II 1 cryptic species was shown to efficiently transmit cotton leaf curl Multan virus (CLCuMuV) [43]. Therefore, in an area where Asia II 1 species are predominant, the implementation of phytosanitary measures and rouging may be not sufficient to limit virus spread. Further research is needed on the control virus transmission by indigenous whitefly species to facilitate the development of durable control strategies. The Asia II 1 species shows a very high level of insecticide resistance [44], which must be taken into account in whitefly population management.

Based on our results, we propose the following basic approaches for controlling the outbreak and spread of CMD: 1) educate farmers and agricultural extension officers about CMD, including how to distinguish CMD symptoms from mineral deficiency or herbicide toxicity; 2) develop CMD-resistant cassava varieties and cultivate them on a sufficiently large scale; 3) practice phytosanitary techniques such as the use of CMD-free planting material and removal (rouging) of diseased plants; and 4) avoid planting cassava varieties susceptible to CMD such as CMR-89 and Rayong 11, especially in high-risk areas.

## **CONCLUSION**

We surveyed the spread of CMD in five major cassava-producing provinces of Thailand along the border with Cambodia. This is the first survey to report patterns of CMD spread,

disease incidence and severity, and whitefly density in Thailand. This information provides a basis for the development of disease management strategies to reduce the spread of CMD in affected areas. Although conducting surveys is costly and time-consuming, the information that is obtained is critical for keeping abreast of disease epidemiology.

## ACKNOWLEDGMENTS

This study was supported by the Center of Excellence on Agricultural Biotechnology, Science and Technology Postgraduate Education and Research Development Office, Office of Higher Education Commission, Ministry of Education (AG-BIO/PERDO-CHE) and Thai Tapioca Development Institute (TTDI), Thailand.

## REFERENCES

1. Malik AI, Kongsil P, Nguyễn VA, Ou W, Sholihin, Srean P, et al. Cassava breeding and agronomy in Asia: 50 years of history and future directions. *Breeding Science*. 2020; 70(2): 145–166.
2. Rybicki EP. A Top Ten list for economically important plant viruses. *Archives of Virology*. 2015; 160(1): 17–20.
3. Warburg O. Die kulturpflanzen usambaras. *Mitteilungen aus den deutschen Schutzgebieten*. 1894; 7: 131–199.
4. Adhikary N, Kumar M, Tarafdar J. Occurrence of Sri Lankan cassava mosaic virus (SLCMV) and its characterization in West Bengal, India. *International Journal of*

- Current Microbiology and Applied Sciences. 2018; 7(1): 2887–2893.
5. Legg J. Epidemiology of a whitefly-transmitted cassava mosaic geminivirus pandemic in Africa. In: Stansly P, Naranjo S, editors. *Bemisia*: Bionomics and Management of a Global Pest. Dordrecht: Springer; 2010. pp. 233–257.
  6. Saunders K, Salim N, Mali VR, Malathi VG, Briddon R, Markham PG, et al. Characterisation of Sri Lankan cassava mosaic virus and Indian cassava mosaic virus: evidence for acquisition of a DNA B component by a monopartite begomovirus. *Virology*. 2002; 293(1): 63–74.
  7. Duraisamy R, Natesan S, Muthurajan R, Gandhi K, Lakshmanan P, Karuppusamy N, et al. Molecular studies on the transmission of Indian cassava mosaic virus (ICMV) and Sri Lankan cassava mosaic virus (SLCMV) in cassava by *Bemisia tabaci* and cloning of ICMV and SLCMV replicase gene from cassava. *Molecular Biotechnology*. 2012. doi: 10.1007/s12033-012-9503-1.
  8. Fauquet C, Fargette D. African cassava mosaic virus: Etiology, epidemiology, and control. *Plant Disease*. 1990; 74(6): 404–411.
  9. Legg JP, Lava Kumar P, Makeshkumar T, Tripathi L, Ferguson M, Kanju E, et al. Cassava virus diseases: biology, epidemiology, and management. *Advances in Virus Research*. 2015; 91: 85–142.
  10. Wang D, Zhang X, Yao X, Zhang P, Fang R, Ye J. A 7-Amino-acid motif of Rep protein essential for virulence is critical for triggering host defense against Sri Lankan cassava mosaic virus. *Molecular Plant-Microbe Interactions*. 2020; 33(1): 78–86.
  11. Wang HL, Cui XY, Wang XW, Liu SS, Zhang ZH, Zhou XP. First report of Sri Lankan cassava mosaic virus infecting cassava in Cambodia. *Plant Disease*. 2016;

- 100(5): 1029.
12. Minato N, Sok S, Chen S, Delaquis E, Phirun I, Le VX, et al. Surveillance for Sri Lankan cassava mosaic virus (SLCMV) in Cambodia and Vietnam one year after its initial detection in a single plantation in 2015. *PLoS One*. 2019; 14(2): e0212780.
  13. Uke A, Hoat TX, Quan MV, Liem NV, Ugaki M, Natsuaki KT. First report of Sri Lankan cassava mosaic virus infecting cassava in Vietnam. *Plant Disease*. 2018; 102(12): 2669.
  14. Chittarath K, Jimenez J, Vongphachanh P, Leiva AM, Sengsay S, Lopez-Alvarez D, et al. First report of Sri Lankan cassava mosaic virus and cassava mosaic disease in Laos. *Plant Disease*. 2021. doi: 10.1094/pdis-09-20-1868-PDN.
  15. Siriwan W, Jimenez J, Hemniam N, Saokham K, Lopez-Alvarez D, Leiva AM, et al. Surveillance and diagnostics of the emergent Sri Lankan cassava mosaic virus (Fam. *Geminiviridae*) in Southeast Asia. *Virus Research*. 2020; 285: 197959.
  16. Sseruwagi P, Sserubombwe WS, Legg JP, Ndunguru J, Thresh JM. Methods of surveying the incidence and severity of cassava mosaic disease and whitefly vector populations on cassava in Africa: a review. *Virus Research*. 2004; 100(1): 129–142.
  17. Ariyo OA, Dixon AG, Atiri GI. Whitefly *Bemisia tabaci* (Homoptera: Aleyrodidae) infestation on cassava genotypes grown at different ecozones in Nigeria. *Journal of Economic Entomology*. 2005; 98(2): 611–617.
  18. Terry E. Description and evaluation of cassava mosaic disease in Africa [1976]. In: Terry E, MacIntyre R, editors. *The International Exchange and Testing of Cassava Germ Plasm in Africa: Proceedings of an Interdisciplinary Workshop*. IDRC: Ottawa; 1976. pp. 53–54.

19. Rabindran R. Survey for the occurrence of cassava mosaic disease in Tamil Nadu. *Journal of Root Crops*. 2011; 37: 197–199.
20. Doyle JJ. A rapid DNA isolation procedure for small quantities of fresh leaf tissue. *Phytochemical Bulletin*. 1987; 19(1): 11–15.
21. Alturki S. Standardization of long term DNA storage and DNA banking methods for conservation of Saudi date palm (*Phoenix dactylifera* L.) genetic diversity. *Asian Journal of Plant Sciences*. 2017; 16(2): 94–100.
22. Holterman M, van der Wurff A, van den Elsen S, van Megen H, Bongers T, Holovachov O, et al. Phylum-wide analysis of SSU rDNA reveals deep phylogenetic relationships among nematodes and accelerated evolution toward crown Clades. *Molecular Biology and Evolution*. 2006; 23(9): 1792–1800.
23. Frohlich DR, Torres-Jerez I, Bedford ID, Markham PG, Brown JK. A phylogeographical analysis of the *Bemisia tabaci* species complex based on mitochondrial DNA markers. *Molecular Ecology*. 1999; 8(10): 1683–1691.
24. Kumar S, Stecher G, Li M, Knyaz C, Tamura K. MEGA X: Molecular Evolutionary Genetics Analysis across Computing Platforms. *Molecular Biology and Evolution*. 2018; 35(6): 1547–1549.
25. Legg J, Thresh JM. Cassava virus diseases in Africa. In: *Proceedings of a Conference on Plant Virology in Sub Saharan Africa, 4–8 June 2001, Ibadan, Nigeria*. 2003; pp. 517–552.
26. Delaquis E, Andersen KF, Minato N, Cu TTL, Karssenber ME, Sok S, et al. Raising the stakes: cassava seed networks at multiple scales in Cambodia and Vietnam. *Frontiers in Sustainable Food Systems*. 2018; 2: 73.

27. Legg J, Ogwal S. Changes in the incidence of African cassava mosaic virus disease and the abundance of its whitefly vector along south-north transects in Uganda. *Journal of Applied Entomology*. 1998; 122(1–5): 169–178.
28. Legg JP, French R, Rogan D, Okao-Okuja G, Brown JK. A distinct *Bemisia tabaci* (*Gennadius*) (Hemiptera: Sternorrhyncha: Aleyrodidae) genotype cluster is associated with the epidemic of severe cassava mosaic virus disease in Uganda. *Molecular Ecology*. 2002; 11(7): 1219–1229.
29. Legg J, James B, Cudjoe A, Saizonou S, Gbaguidi B, Ogbe F, et al. A regional collaborative approach to the study of ACMD epidemiology in Sub-Saharan Africa. *African Crop Science Conference Proceedings*. 1997; 3(2): 1021–1033.
30. Cohen S, Kern J, Harpaz I, Ben-Joseph R. Epidemiological studies of the tomato yellow leaf curl virus (TYLCV) in the Jordan Valley, Israel. *Phytoparasitica*. 1988; 16(3): 259.
31. Wunderground. Historical Weather. 2019.  
(<https://www.wunderground.com/weather/th/bangkok>) California, United States, July 2019.
32. Swanson MM, Harrison BD. Properties, relationships and distribution of cassava mosaic geminiviruses. *Tropical Science*. 1994; 34(1): 15–25.
33. Thresh FD, Fargette D, Otim-Nape GW. The viruses and virus diseases of cassava in Africa. *African Crop Science Journal*. 1994; 2(4): 459–478.
34. Bakker W. Rice yellow mottle, a mechanically transmissible virus disease of rice in Kenya. *Netherlands Journal of Plant Pathology*. 1970; 76(2): 53–63.
35. Gibson RW. Long-term absence of symptoms in heat-treated African cassava mosaic

- geminivirus-infected resistant cassava plants. *Tropical Science*. 1994; 34(1): 154–158.
36. Hemniam N, Saokham K, Roekwan S, Hunsawattanakul S, Thawinampan J, Siriwan W. Severity of cassava mosaic disease in resistance and commercial varieties by grafting. 2019: The 14<sup>th</sup> National Plant Projection Conference, Thailand. 794-799.
37. Fishpool LDC, Fauquet C, Fargette D, Thouvenel JC, Burbac C, Colvin J. The phenology of *Bemisia tabaci* (Homoptera: Aleyrodidae) populations on cassava in southern Côte d'Ivoire. *Bulletin of Entomological Research*. 1995; 85(2): 197–207.
38. Legg J. *Bemisia tabaci*: The whitefly vector of cassava mosaic geminiviruses in Africa: an ecological perspective. *African Crop Science Journal*. 1994; 2(4).
39. Robertson IAD. The whitefly, *Bemisia tabaci* (*Gennadius*) as a vector of African cassava mosaic virus at the Kenya coast and ways in which the yield losses in cassava, *Manihot esculenta* Crantz caused by the virus can be reduced. *International Journal of Tropical Insect Science*. 1987; 8(4–6): 797–801.
40. Leiva AM, Siriwan W, Lopez-Alvarez D, Barrantes I, Hemniam N, Saokham K, et al. Nanopore-based complete genome sequence of a Sri Lankan cassava mosaic virus (geminivirus) strain from Thailand. *Microbiology Resource Announcements*. 2020; 9(6): e01274-19.
41. Chi Y, Pan L-L, Bouvaine S, Fan Y-Y, Liu Y-Q, Liu S-S, et al. Differential transmission of Sri Lankan cassava mosaic virus by three cryptic species of the whitefly *Bemisia tabaci* complex. *Virology*. 2020; 540: 141–149.
42. Götz M, Winter S. Diversity of *Bemisia tabaci* in Thailand and Vietnam and indications of species replacement. *Journal of Asia-Pacific Entomology*. 2016; 19(2): 537–543.



43. Pan L-L, Cui X-Y, Chen Q-F, Wang X-W, Liu S-S. Cotton leaf curl disease: which whitefly is the vector? *Phytopathology*. 2018; 108(10): 1172–1183.
44. Ahmed MZ, De Barro PJ, Greeff JM, Ren S-X, Naveed M, Qiu B-L. Genetic identity of the *Bemisia tabaci* species complex and association with high cotton leaf curl disease (CLCuD) incidence in Pakistan. *Pest Management Science*. 2011; 67(3): 307–317.

## FIGURE LEGENDS

Fig. 1. Phylogenetic analysis of the nucleotide sequences of the mtCOI gene (length = 867 bp) of whitefly (*Bemisia tabaci*) collected from Surin (LC579572), Sakaeo (LC579573), and Buriram provinces (LC579574) of Thailand and that of other whitefly species. Vertical distances are arbitrary. Horizontal distances are proportional to the calculated mutation distances. Numbers at nodes represent percent bootstrap confidence scores (1,000 replicates). The mtCOI gene of *B. tabaci* collected in this study clustered with that of Middle East Asia Minor 1 (MEAM1), *Mediterranean (MED)*, New World, Asia 1, China 1, Asia II 7, Asia II 1, Asia II 3, and New World 2 species available in GenBank.

Fig. 2. Phylogenetic analysis of the nucleotide sequences of the DNA-A component of the Sri Lankan cassava mosaic virus (SLCMV) isolate collected from Buriram province (LC586845) and that of other CMV species. Vertical distances are arbitrary. Horizontal distances are proportional to the calculated mutation distances. Numbers at nodes represent percent bootstrap confidence scores (1,000 replicates). ICMV, Indian cassava mosaic virus; CMMGV, Cassava mosaic Madagascar virus; SACMV, South African cassava mosaic virus; EACMZV, East African cassava mosaic Zanzibar virus; EACMKV, East African cassava mosaic Kenya virus; EACMCV, East African cassava mosaic Cameroon virus; EACMV, East African cassava mosaic virus; EACMMV, East African cassava mosaic Malawi virus.

Fig. 3. Phylogenetic analysis of the nucleotide sequences of the DNA-B component of the SLCMV isolate collected from Buriram province (LC588395) and that of other CMV species. Vertical distances are arbitrary. Horizontal distances are proportional to the calculated mutation distances. Numbers at nodes represent percent bootstrap confidence scores (1,000 replicates). ICMV, Indian cassava mosaic virus; ACMV, African cassava mosaic virus; ACMBFV, African cassava mosaic Burkina Faso virus; EACMCV, East African cassava mosaic Cameroon virus; CMMGV, Cassava mosaic Madagascar virus; EACMZV, East African cassava mosaic Zanzibar virus; EACMMV, East African cassava mosaic Malawi virus; SACMV, South African cassava mosaic virus; EACMV, East African cassava mosaic virus; EACMKV, East African cassava mosaic Kenya virus.

Table 1. Field data of the spread of cassava mosaic disease (CMD) in Thailand, based on a survey conducted across five provinces.

Table 2. Proportion of stem cutting- and whitefly-borne CMD observed in commercial cassava cultivars in Thailand.

## **SUPPLEMENTARY MATERIALS**

Fig. S1. Schematic showing the whole-genome sequencing of Sri Lankan cassava mosaic virus (SLCMV) using the primer walking approach.

Table S1. Cassava mosaic disease (CMD) surveillance data collected from Prachinburi, Sakaeo, Burium, Surin, and Sisaket provinces of Thailand, including field location, cassava cultivar, mode of infection, disease severity, and PCR-based SLCMV detection.



bioRxiv preprint doi: <https://doi.org/10.1101/2021.05.25.445583>; this version posted May 25, 2021. The copyright holder for this preprint (which was not certified by peer review) is the author/funder, who has granted bioRxiv a license to display the preprint in perpetuity. It is made available under aCC-BY 4.0 International license.

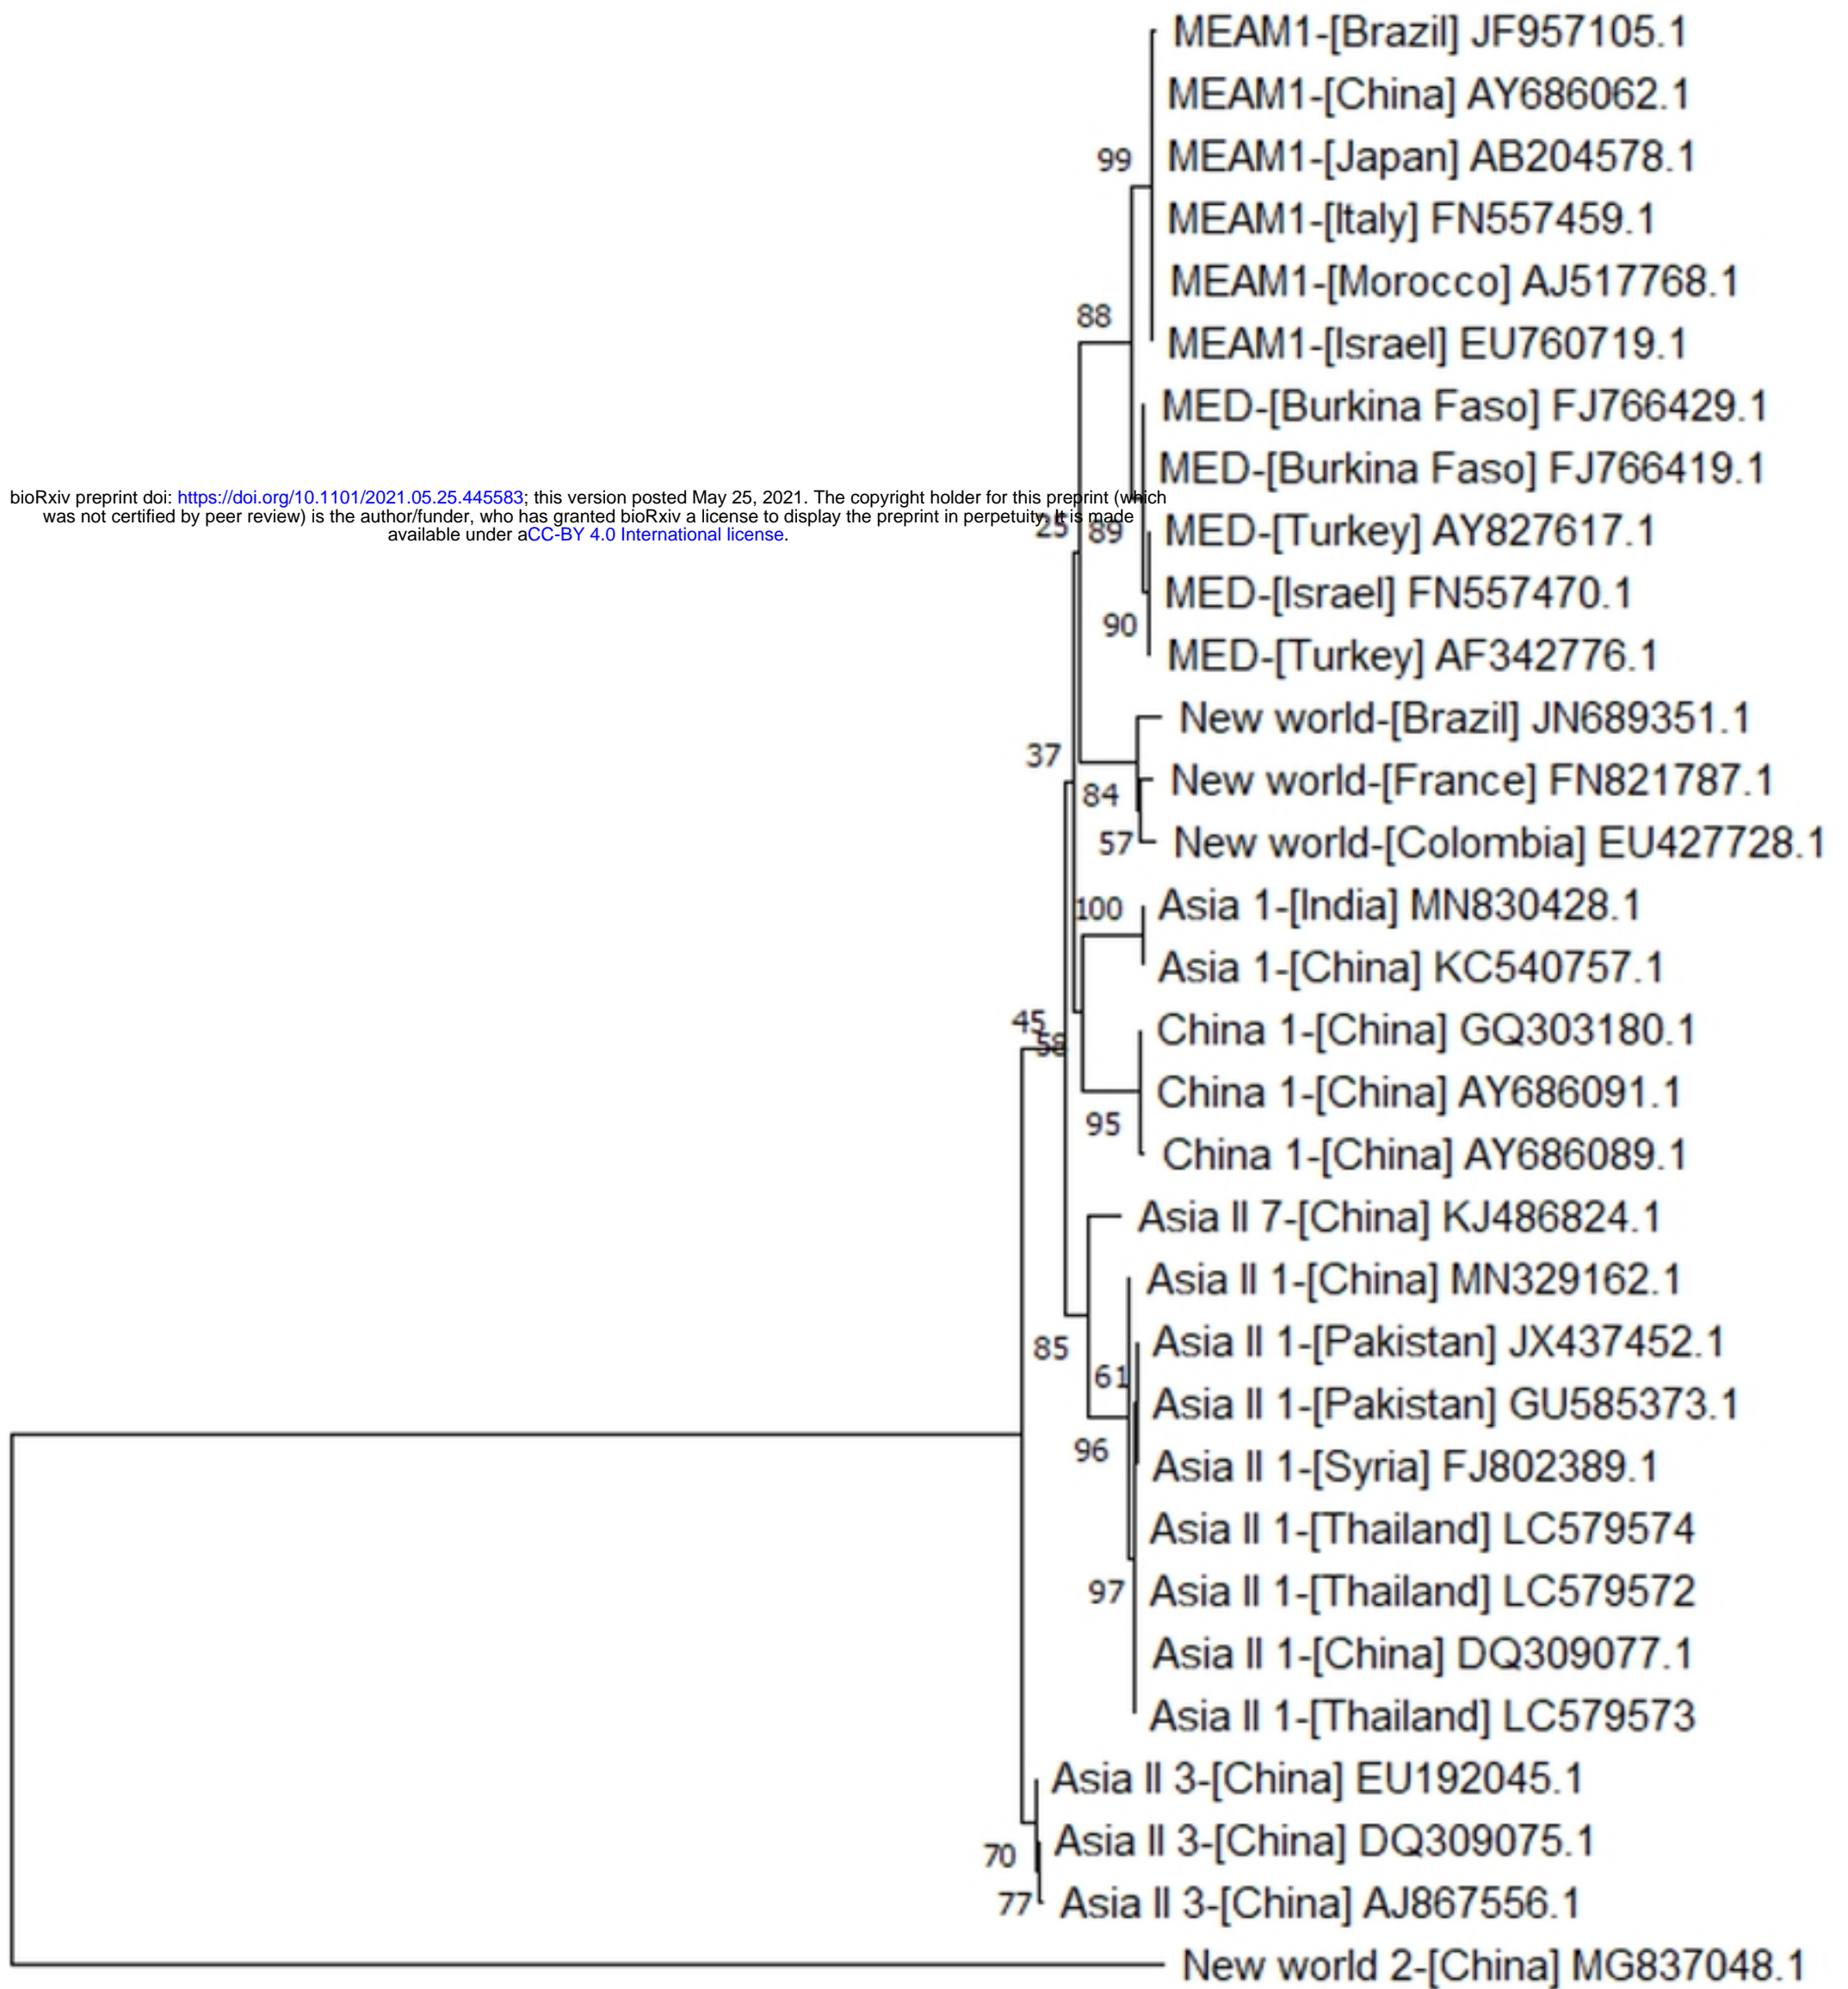

0.20

Fig. 1

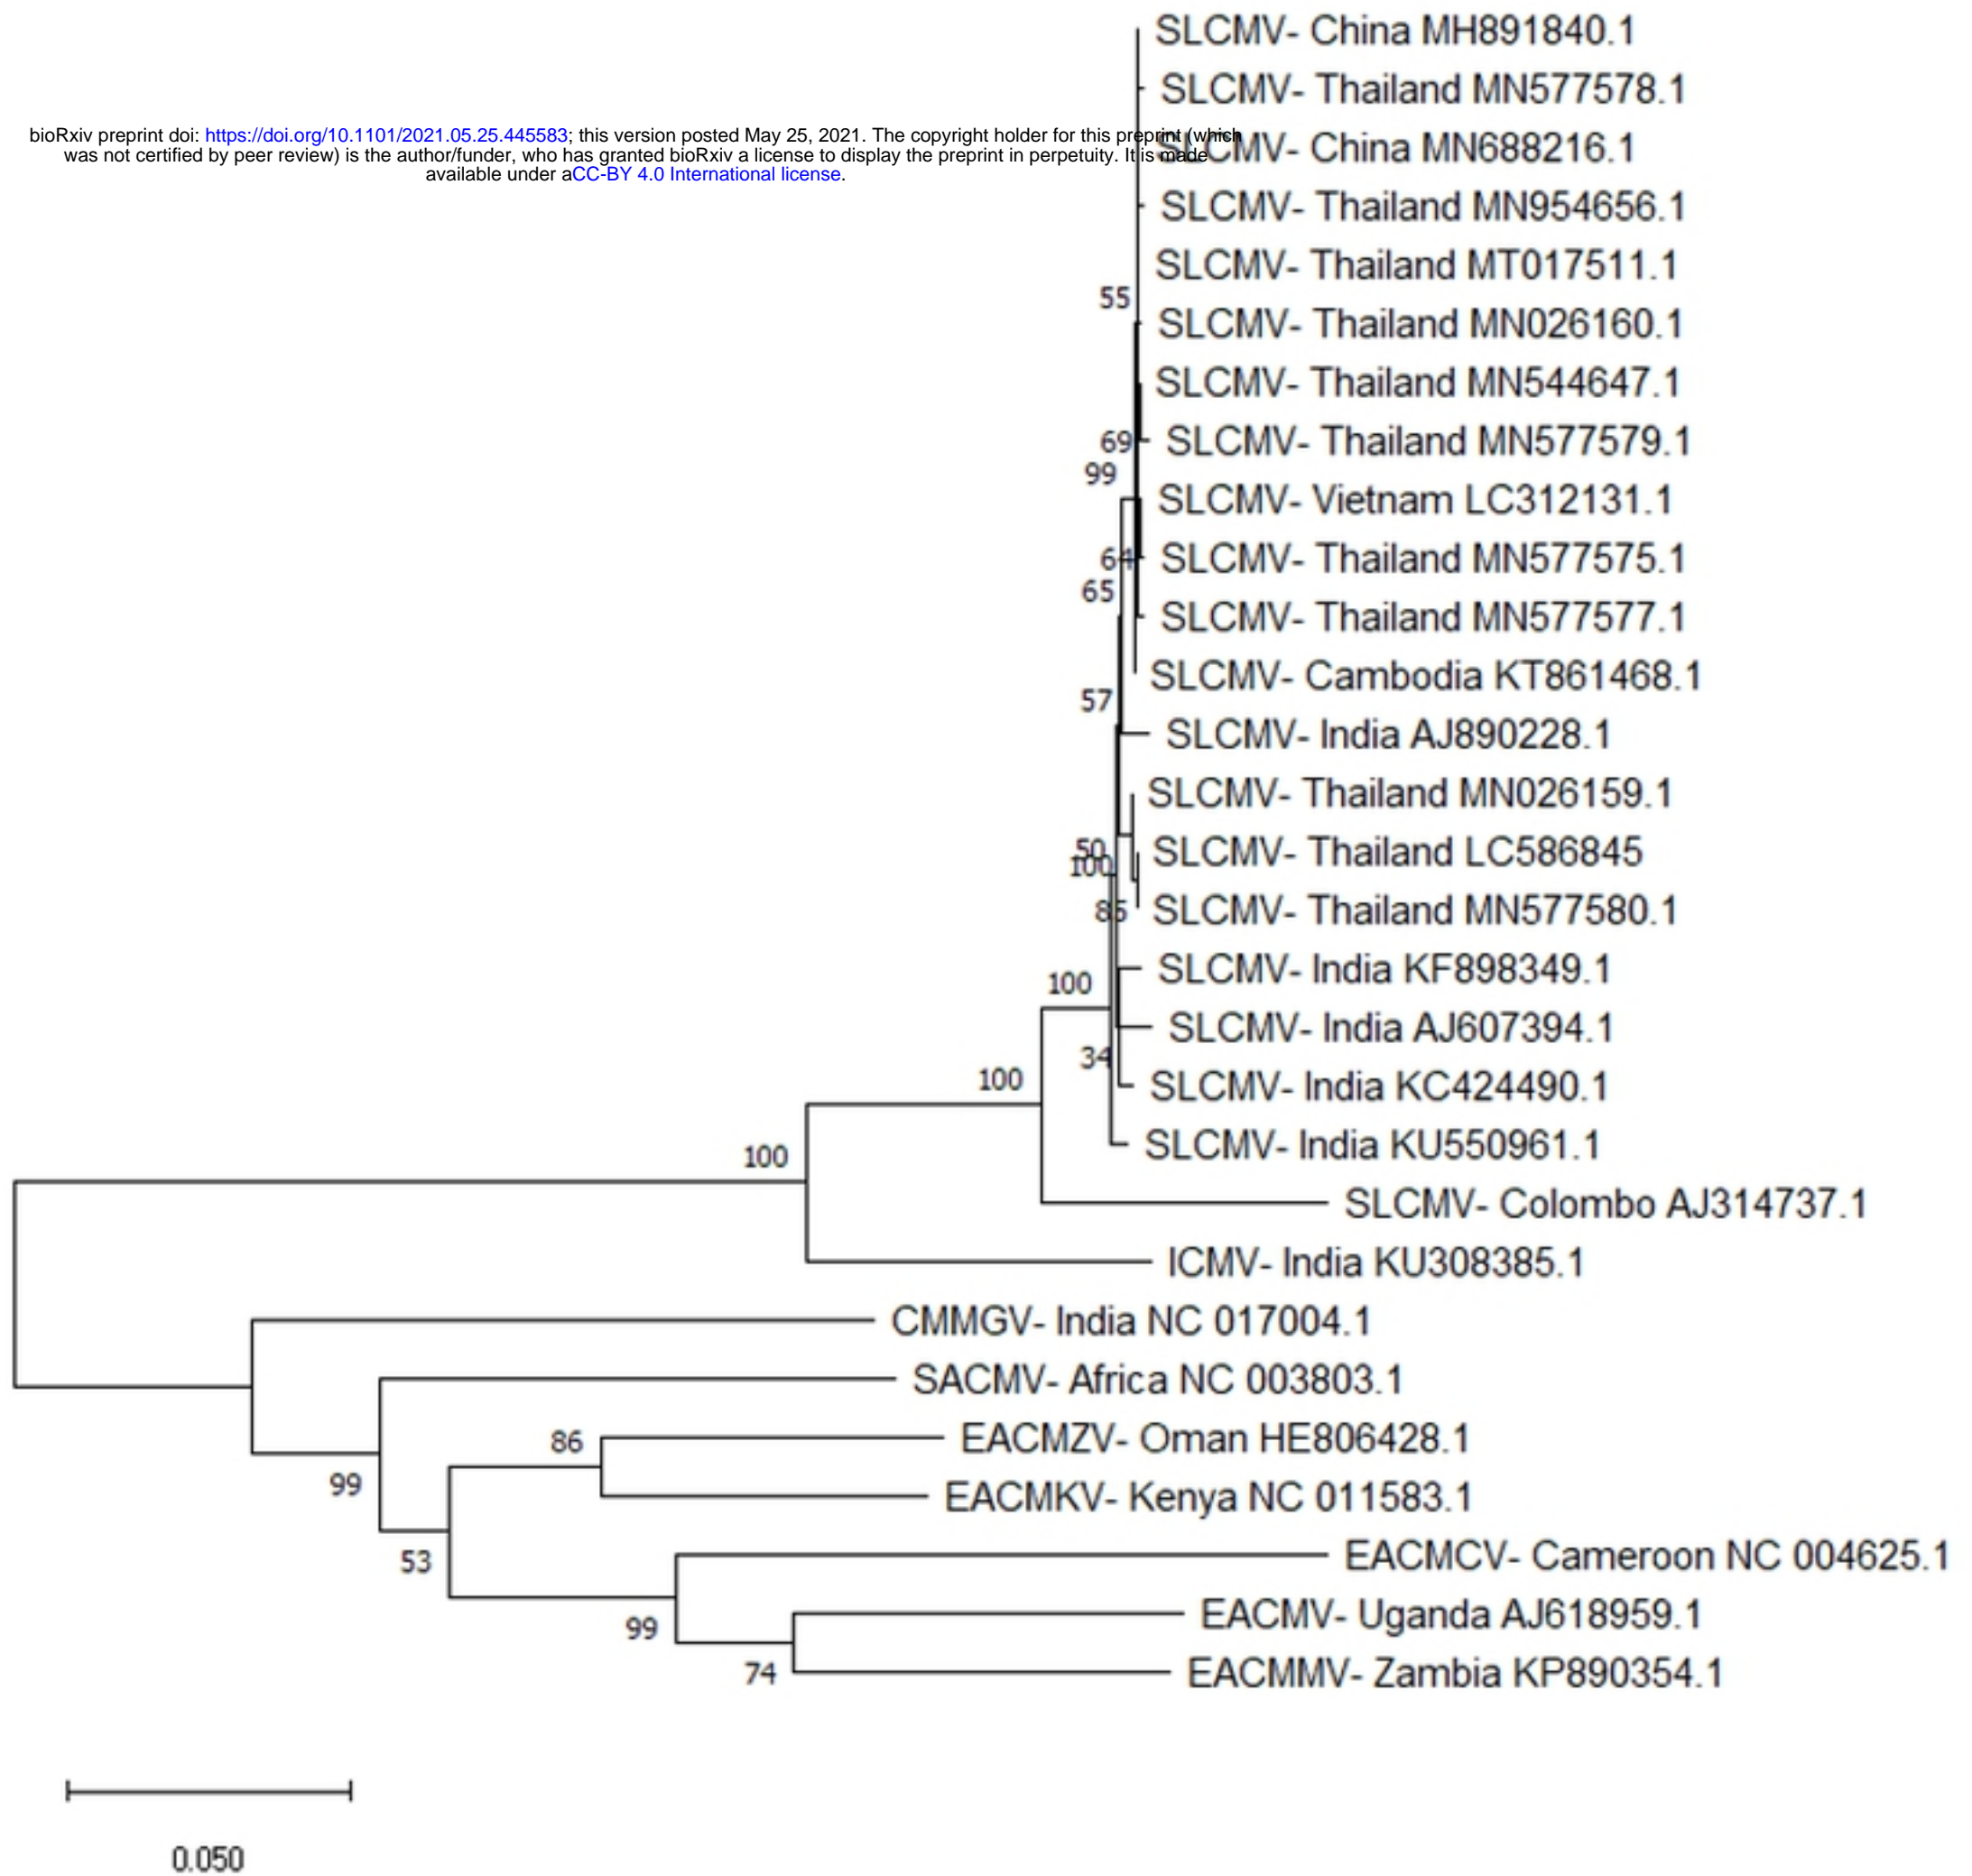

Fig. 2

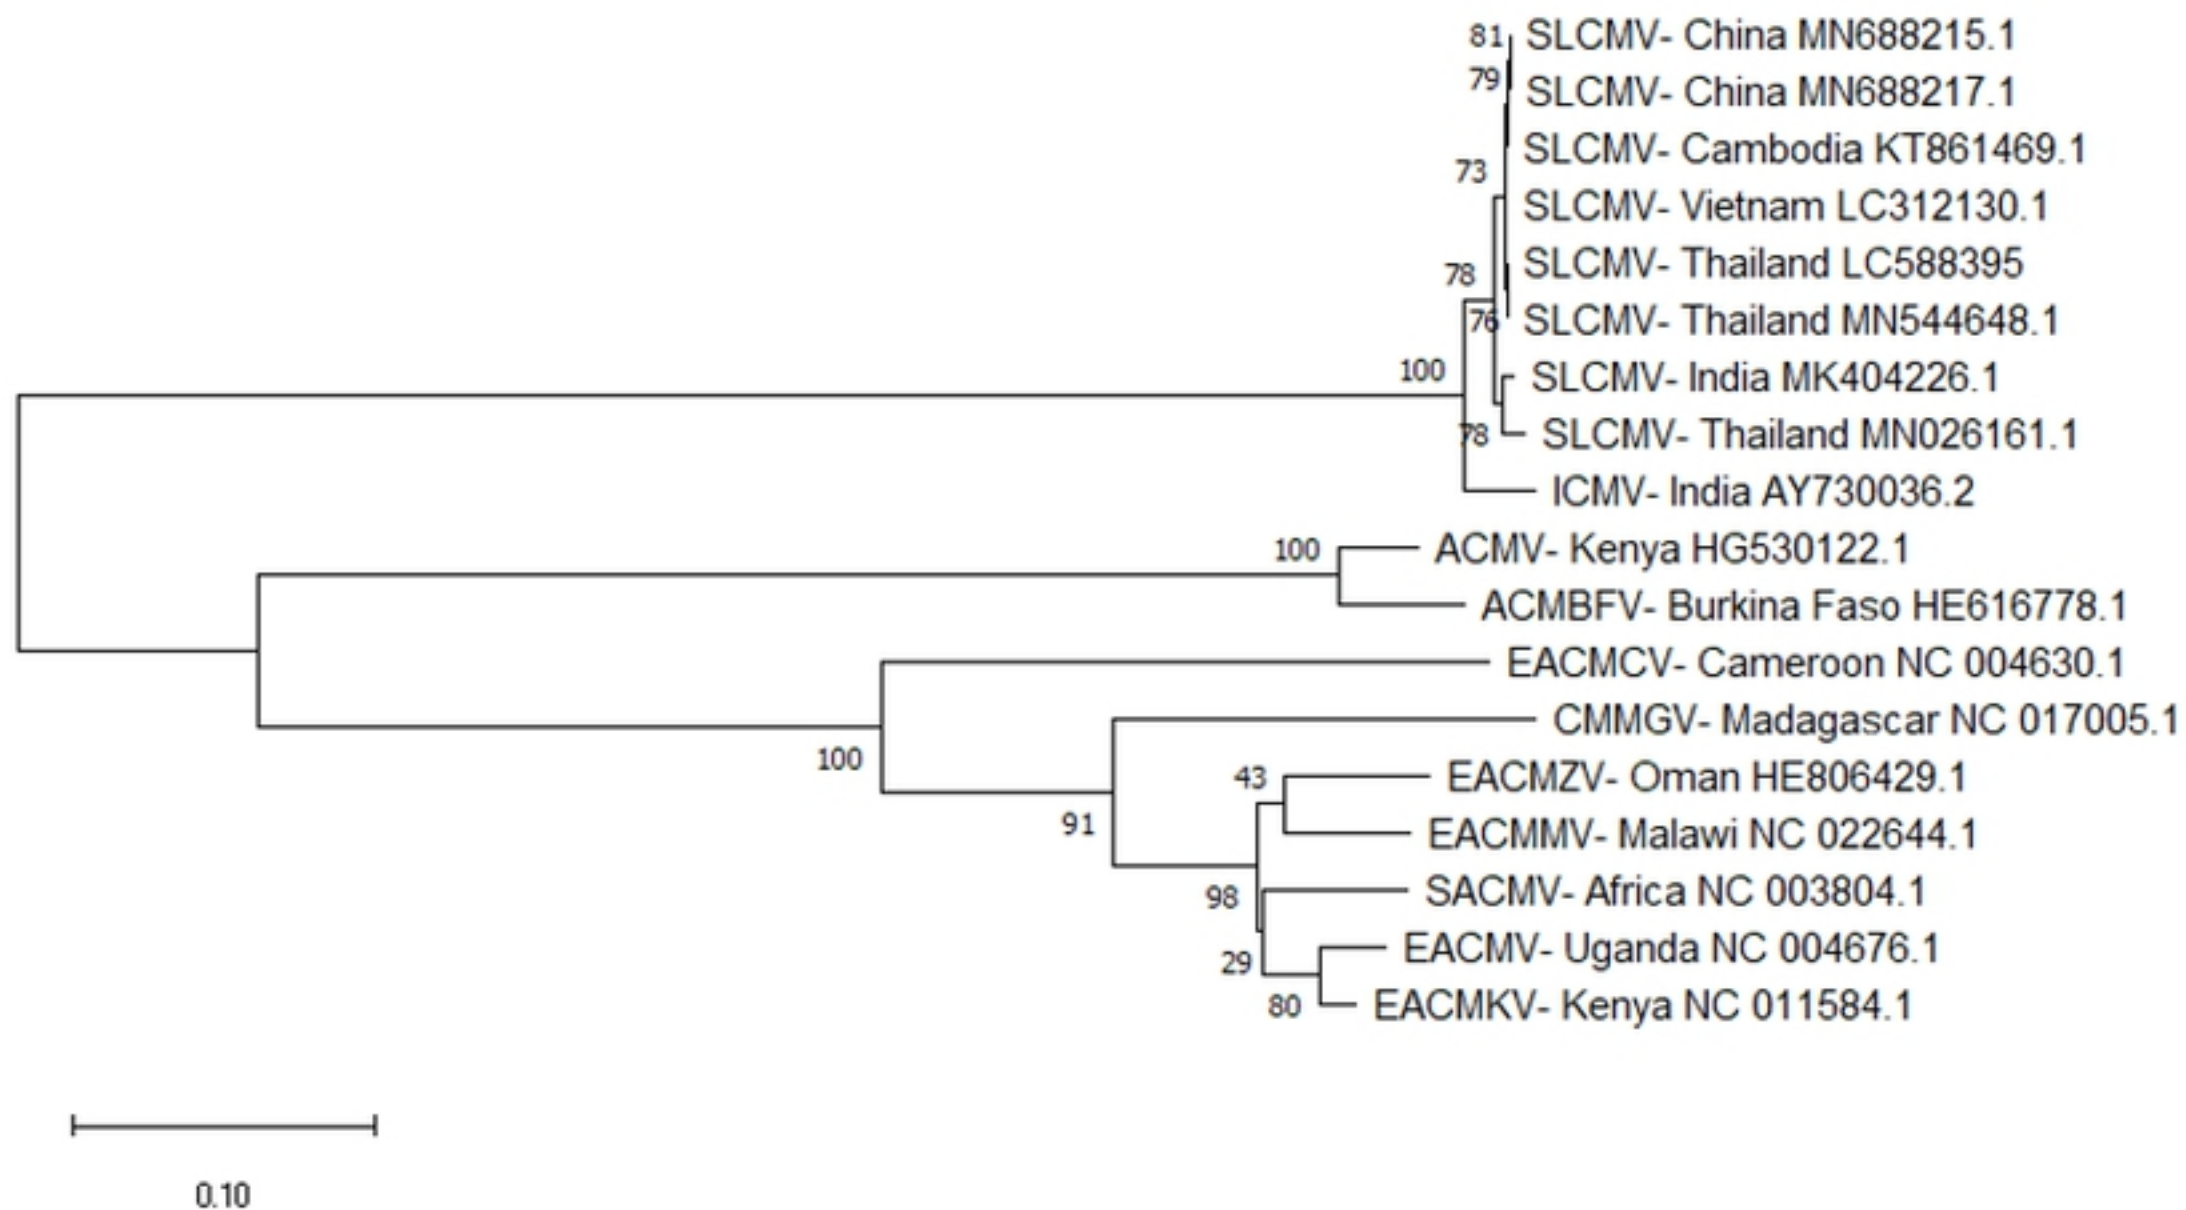

Fig 3

**Table 1** Field spread of CMD in Thailand based on a survey conducted across five provinces

| Province    | Number of fields surveyed/<br>Incidence <sup>b</sup> | Disease prevalence (%) <sup>c</sup> | Incidence (%) | Latent infection (%) <sup>d</sup> | Disease severity <sup>e</sup> | PCR positive (%) <sup>f</sup> | Source of infection (%) |          | Average whitefly number/<br>plant | Cultivar <sup>g</sup>                                                        |
|-------------|------------------------------------------------------|-------------------------------------|---------------|-----------------------------------|-------------------------------|-------------------------------|-------------------------|----------|-----------------------------------|------------------------------------------------------------------------------|
|             |                                                      |                                     |               |                                   |                               |                               | Cutting                 | Whitefly |                                   |                                                                              |
| Prachinburi | 30 (96.2)/24 (67.4)                                  | 80                                  | 26.78         | 5                                 | 2.88                          | 20                            | 11.6                    | 88.4     | 12.2                              | <u>CMR-89, Rayong 72, Rayong 11, Rayong 9 and Huai Bong 80</u>               |
| Sakao       | 65 (148)/28 (59.2)                                   | 43                                  | 43.08         | 0.2                               | 3.7                           | 61.7                          | 1                       | 99       | 5.4                               | <u>CMR-89, Rayong 72, Rayong 11, Kasetsart 50, Rayong 9 and Huai Bong 90</u> |
| Buriram     | 30 (102.4)/11 (28.8)                                 | 37                                  | 7             | 0.1                               | 3.6                           | 4.5                           | 0                       | 100      | 4.0                               | <u>CMR-89, Rayong 72 and Kasetsart 50</u>                                    |
| Surin       | 44 (49)/11 (9.6)                                     | 25                                  | 2.58          | 12                                | 2.5                           | 13                            | 56                      | 44       | 0.3                               | <u>CMR-89, Rayong 72 and Kasetsart 50</u>                                    |
| Sisaket     | 32 (63)/6 (4.5)                                      | 19                                  | 1.25          | 0                                 | 2.4                           | 0.8                           | 33.4                    | 66.6     | 0.5                               | <u>CMR-89, Rayong 72 and Kasetsart 50</u>                                    |

<sup>a</sup> Number of fields visited (number of area (ha)), <sup>b</sup> Percentage number fields of incidence (number of area (ha)), <sup>c</sup> Percentage of prevalence, <sup>d</sup> Percentage of latent infection, <sup>e</sup> Mean CMD severity scores are based on the standard 1 to 5 CMD scoring scale, where 1= no symptoms and 5= severe mosaic with distortion of entire leaf, <sup>f</sup> Result of Positive PCR (Terry 1975).

<sup>g</sup> Cultivars that showed infection are underlined.

**Table 2** Proportion of cutting and whitefly-borne infection observed in cassava commercial cultivars in Thailand

| Cultivar     | CMD incidence <sup>a</sup> (%) | Disease prevalence <sup>b</sup> (%) | Number of fields surveyed <sup>c</sup> /<br>Number of infected fields <sup>d</sup> | Latent infection <sup>e</sup><br>(%) | CMD incidence of infection type <sup>f</sup> (%) |          | Mean CMD severity <sup>g</sup> |
|--------------|--------------------------------|-------------------------------------|------------------------------------------------------------------------------------|--------------------------------------|--------------------------------------------------|----------|--------------------------------|
|              |                                |                                     |                                                                                    |                                      | Cutting                                          | Whitefly |                                |
| CMR-89       | 30.46                          | 50                                  | 106/53                                                                             | 5.14                                 | 2.5                                              | 97.5     | 3.5                            |
| Rayong 72    | 3.98                           | 26.76                               | 71/19                                                                              | 1.7                                  | 15                                               | 85       | 3.16                           |
| Kasetsart 50 | 9.09                           | 9.09                                | 11/1                                                                               | 0                                    | 6.67                                             | 93.33    | 3.4                            |
| Rayong 11    | 40                             | 40                                  | 5/2                                                                                | 0                                    | 23.33                                            | 76.67    | 3.6                            |
| Rayong 9     | 1.67                           | 25                                  | 4/1                                                                                | 0                                    | 50                                               | 50       | 3                              |
| Huaibong 80  | 35.56                          | 100                                 | 3/3                                                                                | 0                                    | 15.63                                            | 84.37    | 2.6                            |
| Huaibong 90  | 100                            | 100                                 | 1/1                                                                                | 0                                    | 0                                                | 100      | 3.4                            |

<sup>a</sup> Percentage of disease incidence, <sup>b</sup> Percentage of prevalence, <sup>c</sup> Number of fields surveyed, <sup>d</sup> Number of infected fields, <sup>e</sup> Percentage of infection, <sup>f</sup> Percentage of CMD incidence of infection type and <sup>g</sup> Mean CMD severity scores are based on the standard 1 to 5 CMD scoring scale, where 1= no symptoms and 5= severe mosaic with distortion of entire leaf,

<sup>h</sup>Result of Positive PCR [18].
